# Supplementary material for: An intelligent T1–T2 switchable MRI contrast agent for the non-invasive identification of vulnerable atherosclerotic plaques
Source: Royal Society of Chemistry journal article supplement (doi:10.1039/d0nr08039j), 2021-01-01
Supplement: d0nr08039j1.pdf [file d0nr08039j1.pdf]

## Supporting Information

### An Intelligent T<sub>1</sub>-T<sub>2</sub> Switchable MRI Contrast Agent for Non-invasive Identification of Vulnerable Atherosclerotic Plaques

Chunshu Pan<sup>a,b,c</sup>, Junjie Lin<sup>d</sup>, Jianjun Zheng<sup>a,b</sup>, Chuang Liu<sup>c</sup>, Bo Yuan<sup>c</sup>, Ozioma Udochukwu Akakuru<sup>c</sup>, M. Zubair Iqbal<sup>c,e</sup>, Qianlan Fang<sup>c</sup>, Jiapeng Hu<sup>c</sup>, Jia Chen<sup>c</sup>, Jie Lin<sup>c</sup>, Qi Dai<sup>a,b,c</sup>, Xiuyu Guo<sup>a,b,c</sup>, Zihou Li<sup>c</sup>, Tao Zhang<sup>c</sup>, Chen Xu<sup>a,b,c</sup>, Xuehua Ma<sup>c</sup>, Tianxiang Chen<sup>a,c,\*</sup>, Aiguo Wu<sup>c,\*</sup>, Yinhua Jin<sup>a,b,c,\*</sup>

<sup>a</sup> Department of Radiology, Hwa Mei Hospital, University of Chinese Academy of Sciences, Ningbo, 315010, China.

<sup>b</sup> Ningbo Institute of Life and Health Industry, University of Chinese Academy of Sciences, Ningbo, 315010, China.

<sup>c</sup> Cixi Institute of Biomedical Engineering, International Cooperation Base of Biomedical Materials Technology and Application, Chinese Academy of Science (CAS) Key Laboratory of Magnetic Materials and Devices & Zhejiang Engineering Research Center for Biomedical Materials, Ningbo Institute of Materials Technology and Engineering, CAS, 1219 ZhongGuan West Road, Ningbo 315201, China.

<sup>d</sup> Department of Anesthesiology, Ningbo Yinzhou No. 2 Hospital, Ningbo, 315192, China.

<sup>e</sup> School of Materials Science and Engineering, Zhejiang Sci-Tech University, Hangzhou, 310018, China.

\*Corresponding authors.

*Email addresses:*

jinyh@ucas.ac.cn (Yinhua Jin)

aiguo@nimte.ac.cn (Aiguo Wu)

chentx@nimte.ac.cn (Tianxiang Chen)

## **Experimental Section**

### **Materials**

Iron (III) chloride hexahydrate ( $\text{FeCl}_3 \cdot 6\text{H}_2\text{O}$ ), polyacrylic acid (PAA,  $M_w \approx 3 \text{ kDa}$ ), 1-ethyl-3-(3-dimethylaminopropyl) carbodiimide (EDC), N-hydroxysuccinimide (NHS), and 2-(N-Morpholino)ethanesulfonic acid (MES) were obtained from Aladdin Industrial Inc. (Shanghai, China). Diethylene glycol (DEG) was obtained from Sinopharm Chemical Reagent Co. Ltd (Shanghai, China). Hyaluronic acid (HA,  $M_w \approx 66\text{-}99 \text{ kDa}$ ) was obtained from Ruixi Biological Technology Co. Ltd (Xi'an, China).

### **Synthesis of iron oxide nanoparticles-oleic acid (IONP-OA)**

First, 3.4 g of  $\text{FeCl}_3 \cdot 6\text{H}_2\text{O}$  was dissolved in 12 mL distilled water to obtain a clear solution. Then, 10.5 g of sodium oleate was added to the above clear solution. A mixed solvent composed of 45 mL n-hexane and 25 mL ethanol was injected into the reaction mixture and the resulting solution was heated at  $70^\circ\text{C}$  for 4 h. The upper organic layer (iron oleate) was separated and washed three times with distilled water. Then, n-hexane was evaporated from the iron oleate complex by slow heating. Second, 2 g of iron oleate complex was dissolved in a mixture of 20 mL oleyl alcohol and 0.3 mL oleic acid at room temperature. The mixture was refluxed at  $260^\circ\text{C}$  for 30 min in an  $\text{N}_2$  atmosphere. Thereafter, the resulting solution was cooled to room temperature, washed with 50 mL acetone and separated by centrifugation. Then the nanoparticles were washed with ethanol three times, and dispersed in cyclohexane.

### **Synthesis of iron oxide nanoparticles-polyacrylic acid (IONP-P)**

1 g of PAA was dissolved into 16 mL of DEG, and then the mixture was heated to  $110^\circ\text{C}$

with vigorous stirring under N<sub>2</sub> flow. 1 mL cyclohexane solution of IONP-OA nanoparticles was injected to the hot solution. The mixture was heated to 240°C and kept at this temperature for 1 h under stirring. After the solution was cooled to room temperature, it was centrifuged at 4000 rpm for 5 min. The supernatant was added with 50 mL distilled water, and ultrafiltration centrifugal filter (10 kDa, Millipore, Ireland) was used for centrifuging for 5 times. Finally, the IONP-P solution was collected and stored in a refrigerator.

### **Synthesis of amine-functionalized hyaluronic acid (HA-NH<sub>2</sub>)**

The synthesis of amine-functionalized HA (HA-NH<sub>2</sub>) was performed according to a pervious report<sup>1</sup>. 200 mg of HA was dissolved in 10 mL of MES buffer to obtain the HA solution. 92 mg of EDC and 55 mg of NHS were dissolved in 200 µL of MES buffer and added sequentially to HA solution during stirring. Subsequently, the pH of solution was adjusted to 7 using 5 M NaOH. Then 128 µL of ethylenediamine was added to the solution, and the pH was immediately adjusted to 7 using 5 M HCl and kept stirring for 12 h. The HA-NH<sub>2</sub> was purified by dialysis against water using a dialysis bag (molecular weight cut-off = 14 kDa, Viskase, USA) and four series of ethanol precipitation. The ethanol precipitation includes the following steps: NaCl was added to the solution of HA to obtain a concentration of 5% NaCl. Subsequently, 3 parts of ethanol was added to the solution, and the mixture was shaken vigorously until a white precipitate appeared. Then, the white precipitate was collected by centrifugation at 4000 rpm for 20 min. After four times of ethanol precipitation, the white HA-NH<sub>2</sub> was dissolved in ultrapure water, dialyzed against water overnight and freeze-dried.

The dry lyophilizate was weighed and dissolved in 10 mL of ultrapure water, and stored in a refrigerator.

#### **Synthesis of iron oxide nanoparticles-hyaluronic acid-polyacrylic acid (IONP-HP)**

For the synthesis of IONP-HP, EDC (92 mg) and NHS (55 mg) were dissolved into IONP-P aqueous solution and kept stirring for 4 h at room temperature. Then, 1 mL of HA-NH<sub>2</sub> aqueous solution was added dropwise to the above solution under stirring, and keep stirring overnight. The final product was collected by centrifugation using ultrafiltration centrifugal tube (30 kDa, Millipore, Ireland).

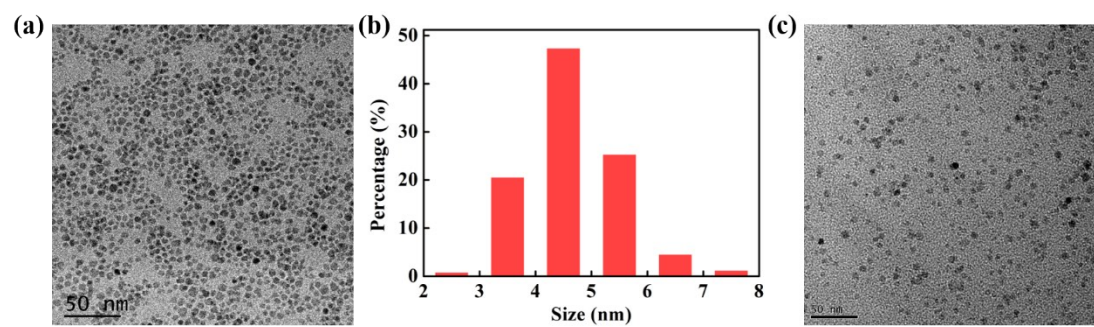

**Fig. S1** (a) TEM image and (b) size distribution of IONP-OA. (c) TEM image of IONP-P.

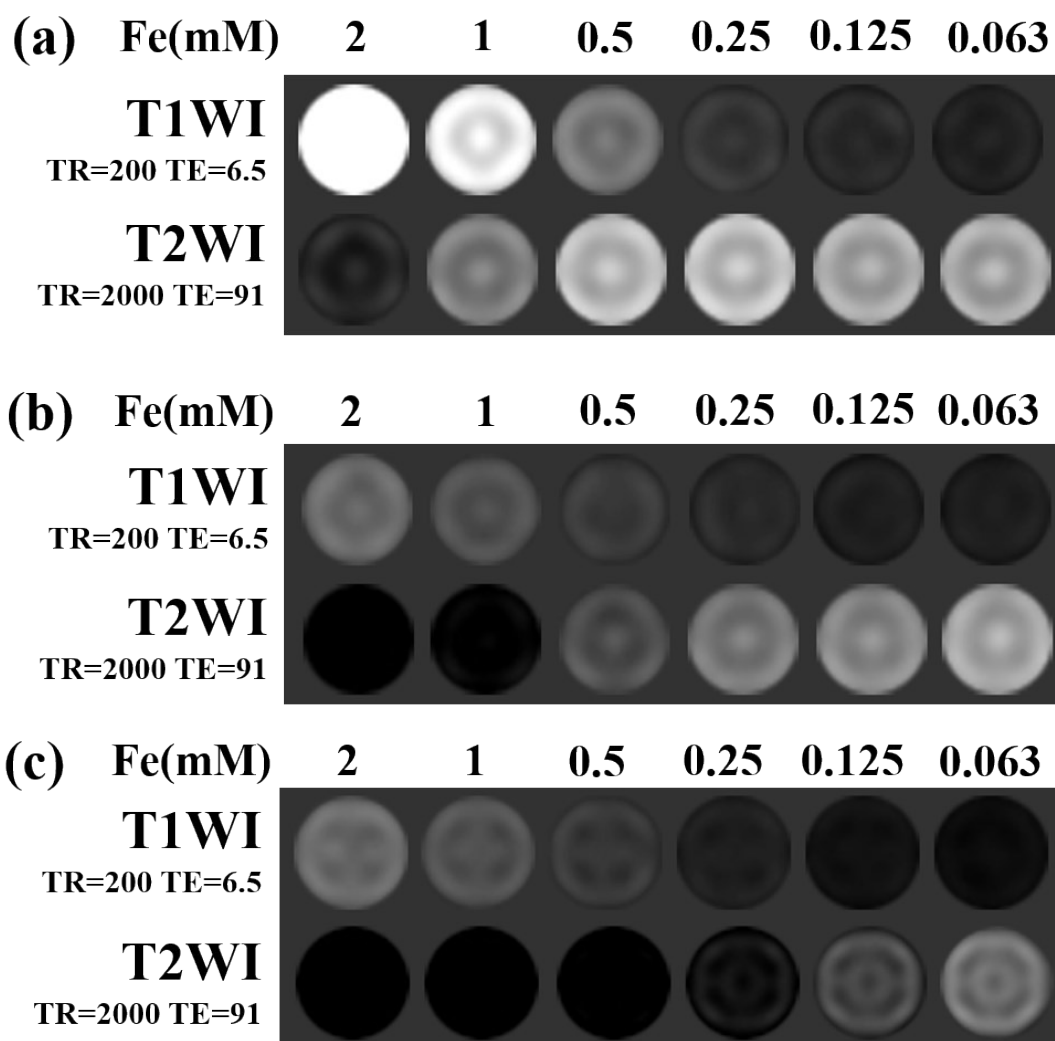

**Fig. S2** T<sub>1</sub>-weighted images (T1WI) and T<sub>1</sub>-weighted images (T2WI) of IONP-HP at the acid environment of (a) pH = 6, (b) pH = 5, (c) pH = 4 with different Fe concentration on a 1.5 T MRI scanner.

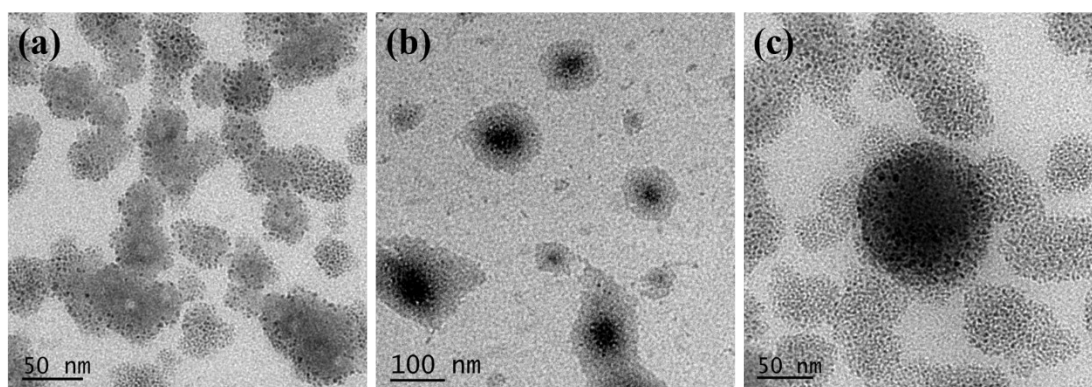

**Fig. S3** TEM images of the formed IONP-HP clusters at (a) pH = 6, (b) pH = 5 and (c) pH = 4.

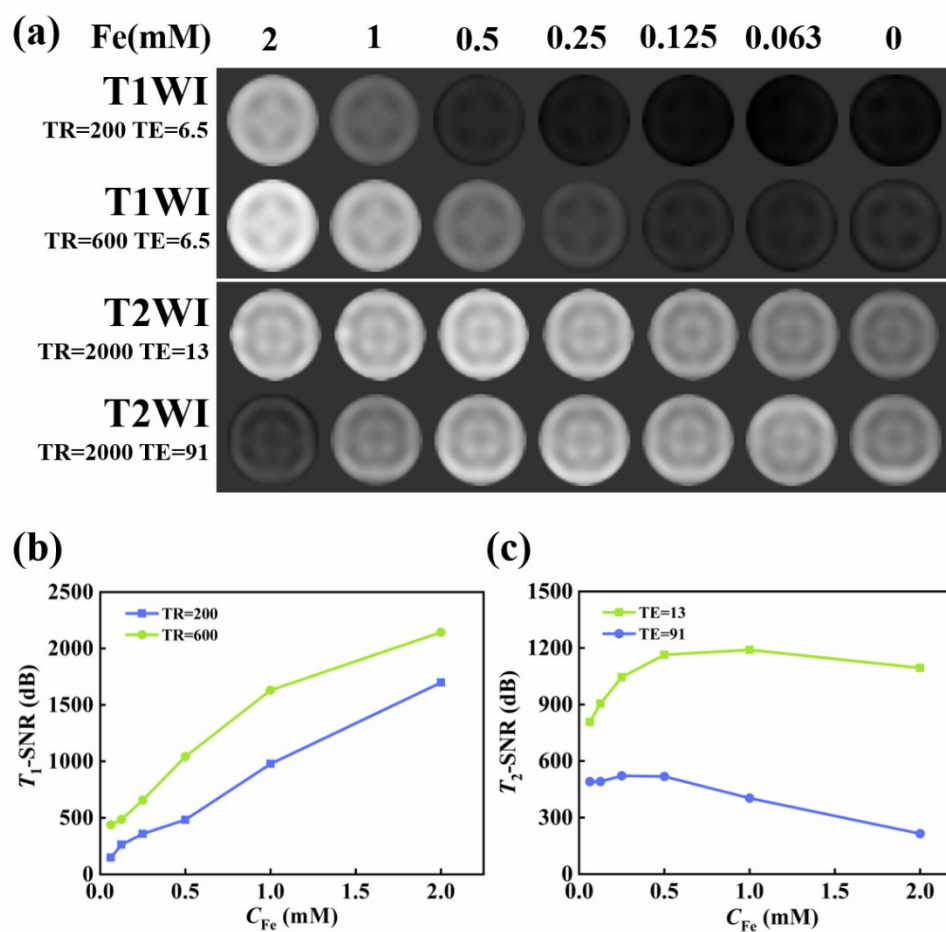

**Fig. S4** (a)  $T_1$ -weighted images (TR = 200 and 600 ms; TE = 6.5 ms) and  $T_2$ -weighted images (TR = 2000 ms; TE = 13, 91 ms) of IONP-P at different Fe concentrations on a 1.5 T MRI scanner. The SNRs of IONP-P from the (b)  $T_1$ - and (c)  $T_2$ -weighted images at different Fe concentrations.

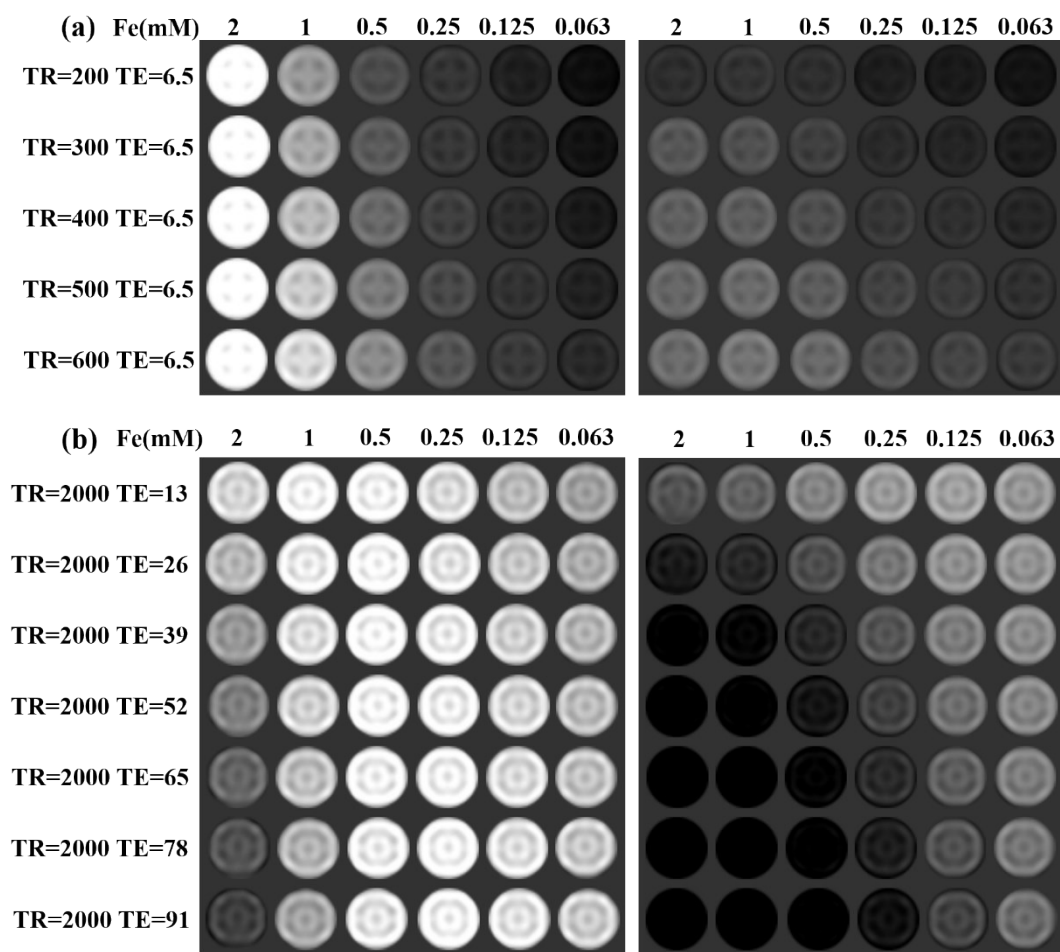

**Fig. S5** (a)  $T_1$ -weighted images ( $TR = 200, 300, 400, 500, 600$  ms and  $TE = 6.5$  ms) of (left) dispersed and (right) clustered IONP-HP *versus* different Fe concentrations ( $[\text{Fe}] = 0, 0.063, 0.25, 0.5, 1, \text{ and } 2$  mM) at 1.5 T. (b)  $T_2$ -weighted images ( $TE = 13, 26, 39, 52, 65, 78, \text{ and } 91$  ms;  $TR = 2000$  ms) of (left) dispersed and (right) clustered IONP-HP *versus* different Fe concentrations at 1.5 T.

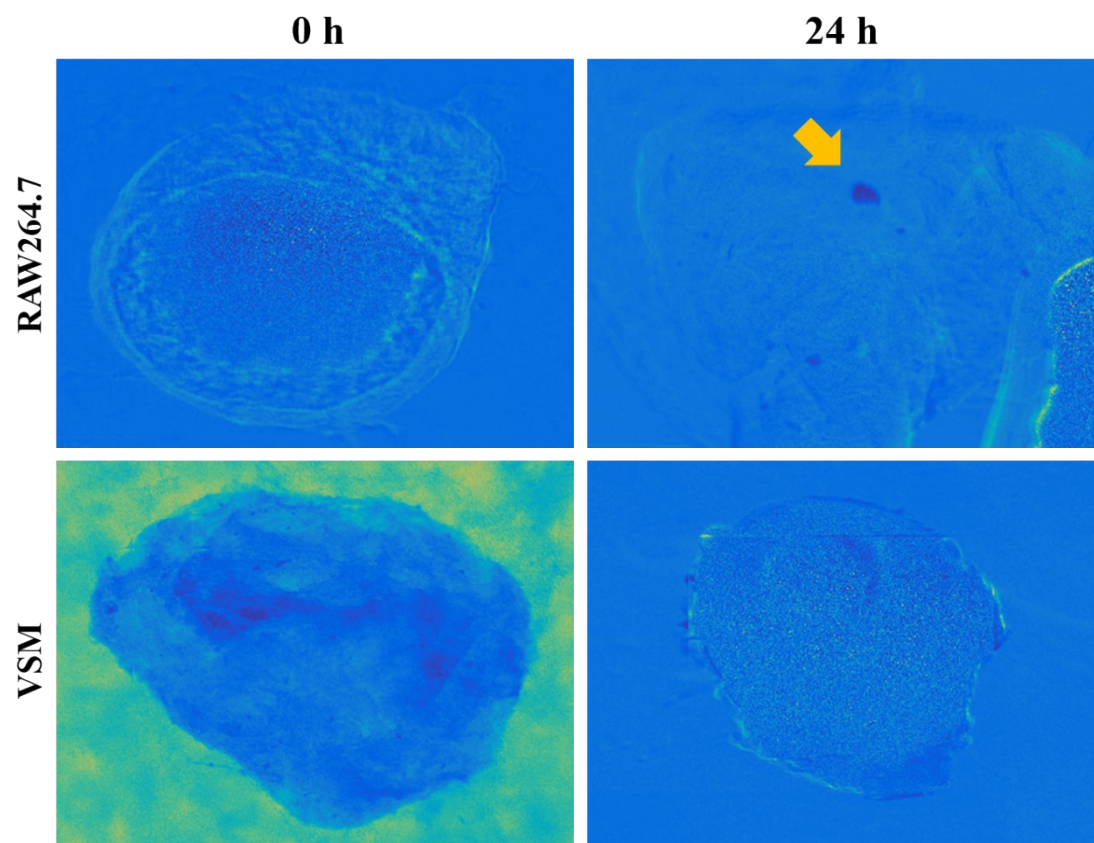

**Fig. S6** 2-D soft X-ray microscopy images of RAW264.7 and VSM cells incubated with IONP-HP for 24 h.

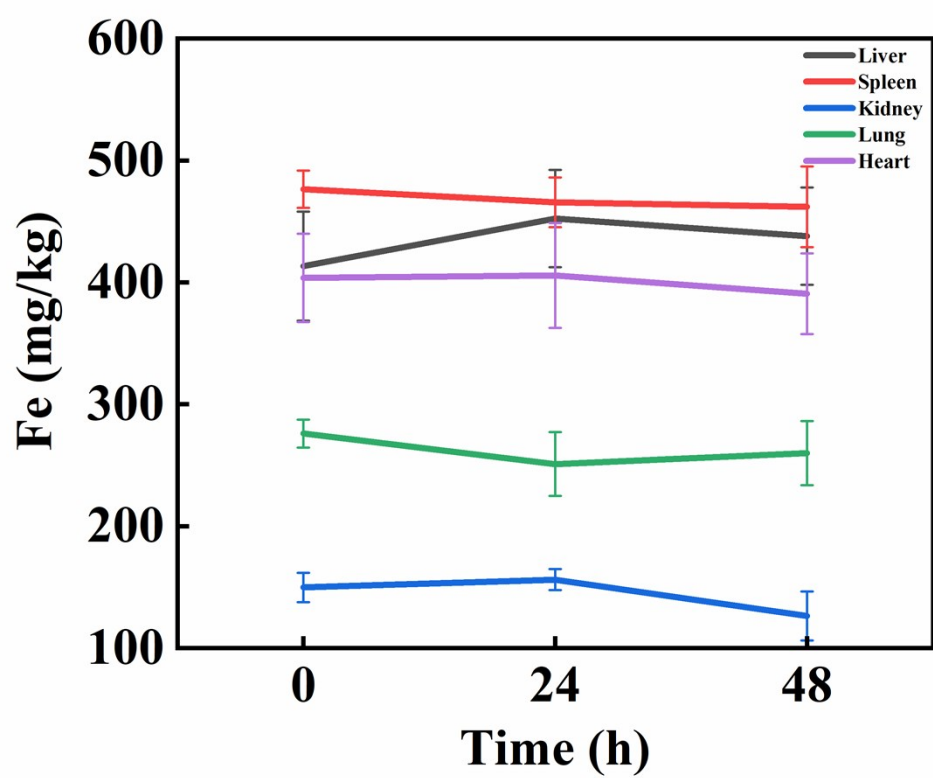

**Fig. S7** Biodistribution of Fe in mice major organs after intravenous injection of IONP-HP.

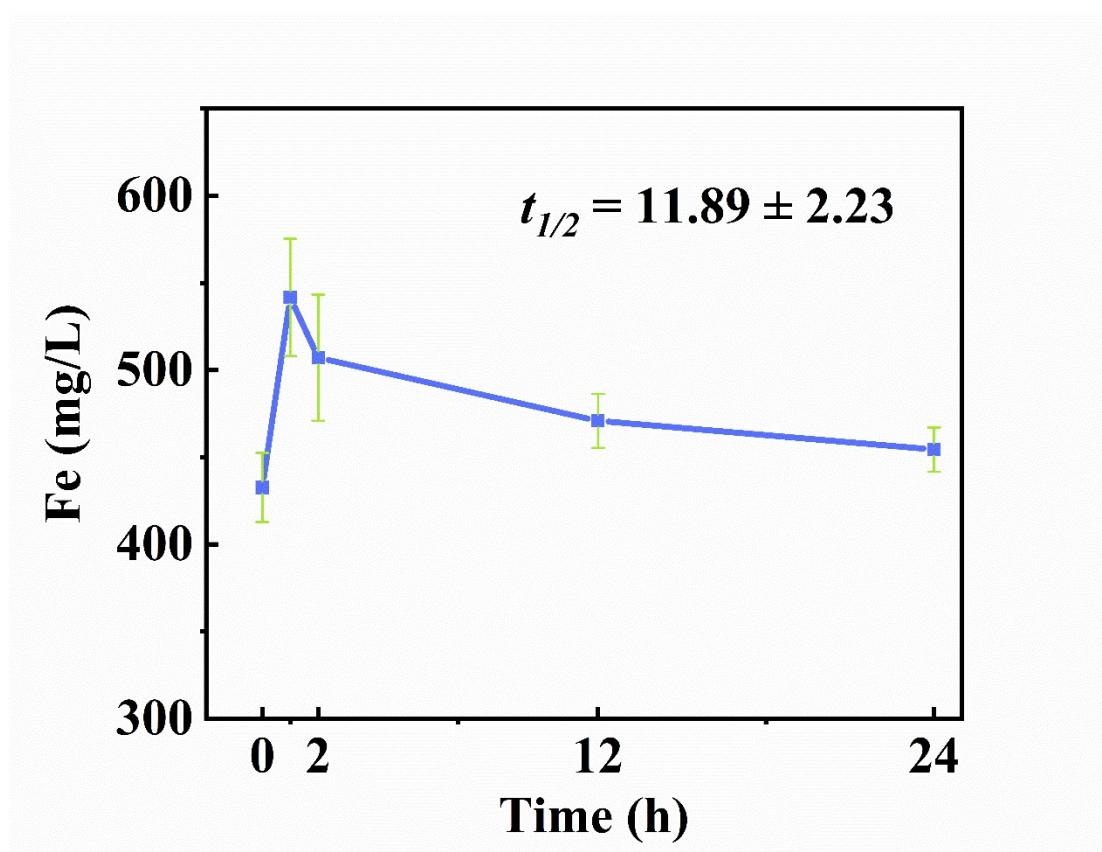

**Fig. S8** Concentration curve of Fe in blood before and after intravenous injection of IONP-HP in mice.

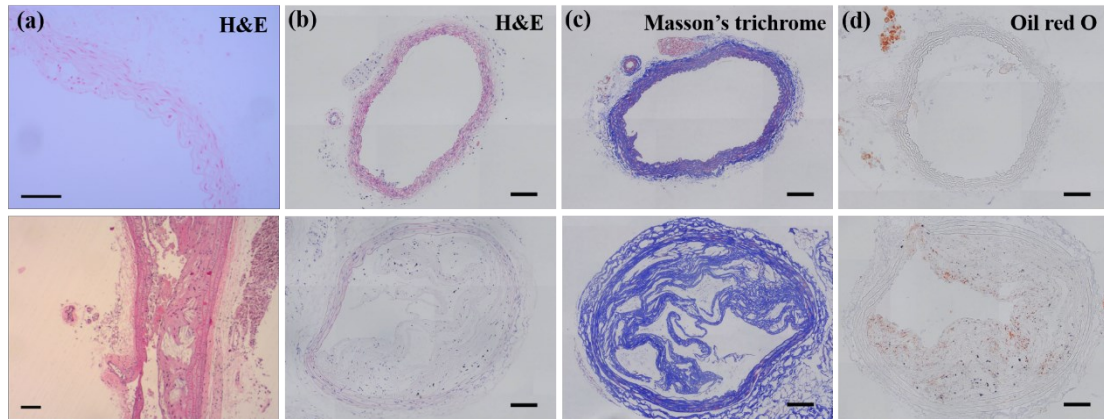

**Fig. S9** (a) Micrographs of (up) stable and (down) vulnerable plaques. (b-d) Histological analysis of (up) healthy aortas and (down) vulnerable plaques by different dye-staining. Scale bar is 100  $\mu\text{m}$ .

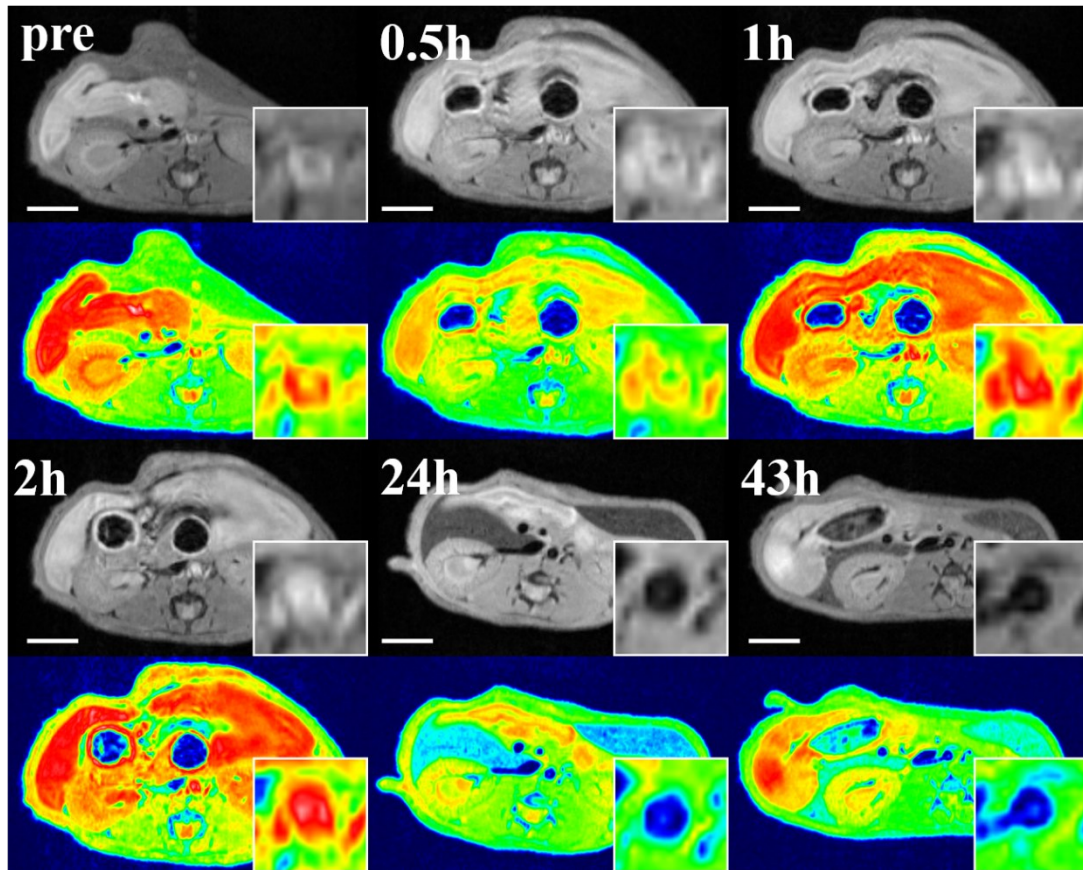

**Fig. S10** T1-weighted images and corresponding color-coded images of ApoE<sup>-/-</sup> mouse in vulnerable plaque group at different time points before and after intravenous injection of IONP-HP. Scale bars is 5 mm.

## Reference

1. T. J. Beldman, M. L. Senders, A. Alaarg, C. Perez-Medina, J. Tang, Y. Zhao, F. Fay, J. Deichmoller, B. Born, E. Desclos, N. N. van der Wel, R. A. Hoebe, F. Kohen, E. Kartvelishvily, M. Neeman, T. Reiner, C. Calcagno, Z. A. Fayad, M. P. J. de Winther, E. Lutgens, W. J. M. Mulder and E. Kluza, *ACS Nano*, 2017, **11**, 5785-5799.
